# Supplementary material for: Linking gastrointestinal microbiota and metabolome dynamics to clinical outcomes in paediatric haematopoietic stem cell transplantation
Source: PubMed Central journal article supplement (PMC9185888; doi:10.1186/s40168-022-01270-7), 2022-06-10

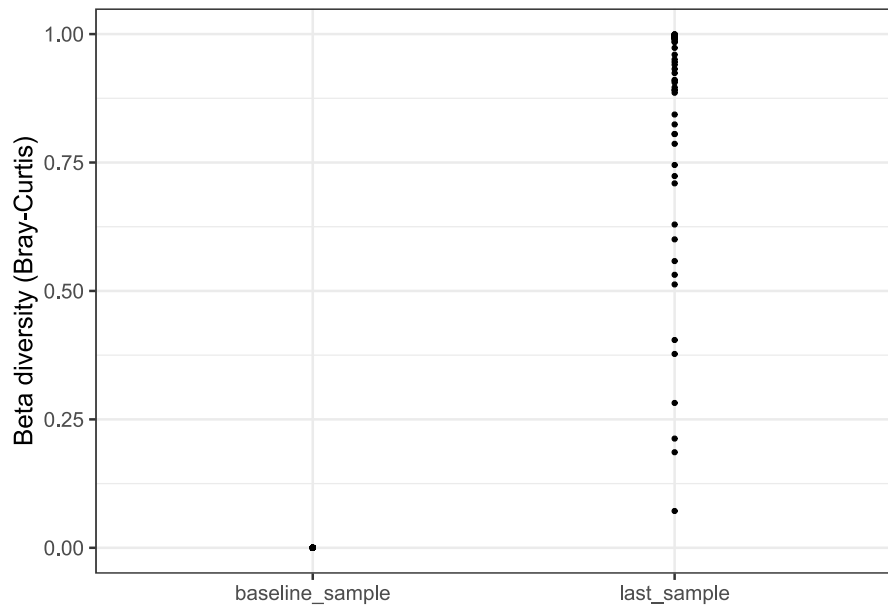

Supplement: 40168_2022_1270_MOESM8_ESM.pdf [file 40168_2022_1270_MOESM8_ESM.pdf]
